# Supplementary material for: Development and Evaluation of the Magnetic Properties of a New Manganese (II) Complex: A Potential MRI Contrast Agent
Source: MDPI journal article supplement (doi:10.3390/ijms24043461), 2023-02-09
Supplement: s1 [file s1]

## Supplementary Materials

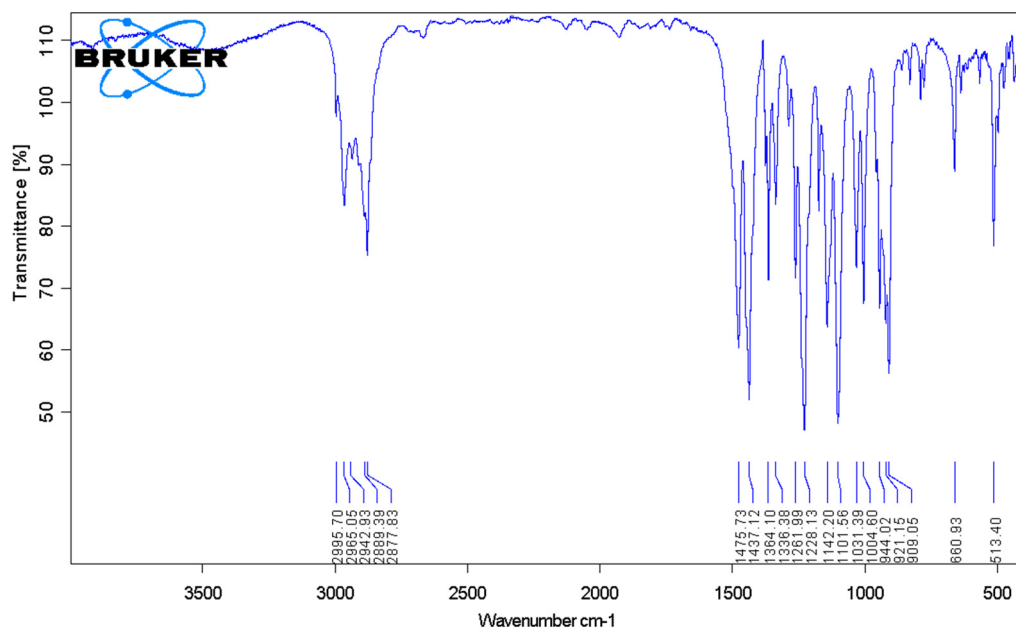

**Figure S1.** IR spectra of the Mn4 compound

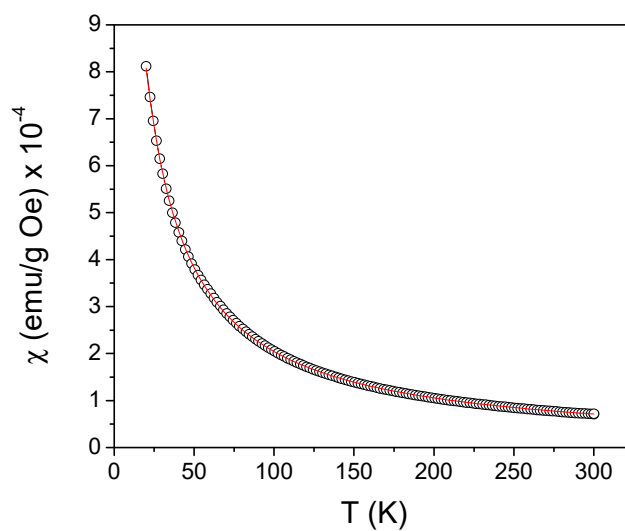

**Figure S2.** Mass susceptibility ( $\chi$ ) as a function of temperature ( $T$ ) measured on the Mn1 compound, in  $H_{\text{appl}} = 10$  kOe (open symbols). At  $T = 300$  K,  $\chi = (7.2 \pm 0.2) \times 10^{-5}$  emu/g Oe. The red line is the fitting curve to the Curie Weiss law with  $\theta = (-7.0 \pm 0.3)$  K. From relation (2) reported in the main article,  $\mu_{\text{eff}} = (5.9 \pm 0.2)$  BM.

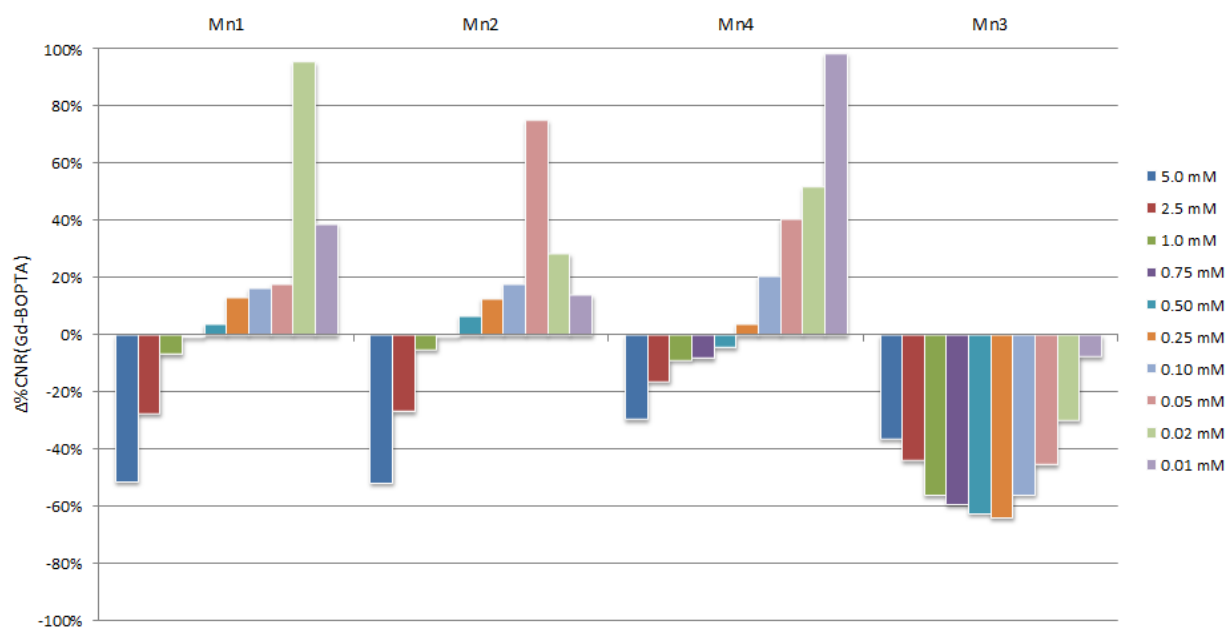

**Figure S3.** Variation of contrast to noise ratio (CNR) relative to Gd-BOPTA in the same concentration for Mn complexes represented in graphical format.
